# Supplementary material
Source: PubMed Central journal article supplement (PMC9402379)
Supplement: NIHMS1828150-supplement-Supplementary_Information.pdf [file NIHMS1828150-supplement-Supplementary_Information.pdf]

**The Human Pangenome Project: A Global Resource to Map Genomic Diversity**  
**Supplementary Information Guide**

**Item 1: Supplemental Table 1. 47 genomes comprise the initial pangenome data resources.**

**Item 2: Current Membership of the Human Pangenome Reference Consortium**

**Supplemental Table 1. 47 genomes comprise the initial pangenome\*.**

| Sample      | Cohort    | HiFi | ONT  | ONT<br>>100kb | Bionano | HiC  | Child | Mat. | Pat. |
|-------------|-----------|------|------|---------------|---------|------|-------|------|------|
| HG00438     | HPRC      | 41X  | 44X  | 16X           | 162X    | 93X  | 36X   | 36X  | 33X  |
| HG00621     | HPRC      | 40X  | 34X  | 14X           | 243X    | 95X  | 35X   | 38X  | 44X  |
| HG00673     | HPRC      | 40X  | 37X  | 13X           | 163X    | 98X  | 34X   | 32X  | 36X  |
| HG00735     | HPRC      | 43X  | 33X  | 12X           | 167X    | 82X  | 35X   | 37X  | 36X  |
| HG00741     | HPRC      | 38X  | 47X  | 18X           | 127X    | 77X  | 37X   | 36X  | 36X  |
| HG01071     | HPRC      | 35X  | 43X  | 16X           | 167X    | 78X  | 37X   | 35X  | 55X  |
| HG01106     | HPRC      | 47X  | 45X  | 15X           | 164X    | 73X  | 37X   | 45X  | 33X  |
| HG01123     | HPRC      | 39X  | 17X  | 6X            | 164X    | 62X  | -     | 45X  | 35X  |
| HG01175     | HPRC      | 36X  | 48X  | 18X           | 161X    | 78X  | 35X   | 36X  | 34X  |
| HG01258     | HPRC      | 36X  | 23X  | 10X           | 105X    | 74X  | 37X   | 36X  | 39X  |
| HG01358     | HPRC      | 38X  | 21X  | 6X            | 163X    | 63X  | 38X   | 34X  | 37X  |
| HG01361     | HPRC      | 42X  | 35X  | 11X           | 169X    | 54X  | 38X   | 36X  | 35X  |
| HG01891     | HPRC      | 37X  | 39X  | 16X           | 165X    | 48X  | 37X   | 33X  | 36X  |
| HG01928     | HPRC      | 35X  | 27X  | 11X           | 109X    | 81X  | 38X   | 38X  | 36X  |
| HG01952     | HPRC      | 41X  | 33X  | 12X           | 163X    | 70X  | 37X   | 34X  | 33X  |
| HG01978     | HPRC      | 38X  | 41X  | 16X           | 167X    | 103X | 40X   | 36X  | 33X  |
| HG02148     | HPRC      | 40X  | 20X  | 6X            | 164X    | 72X  | 38X   | 37X  | 33X  |
| HG02257     | HPRC      | 36X  | 27X  | 10X           | 167X    | 59X  | 38X   | 34X  | 36X  |
| HG02486     | HPRC      | 40X  | 31X  | 9X            | 163X    | 45X  | -     | 35X  | 37X  |
| HG02559     | HPRC      | 41X  | 26X  | 8X            | 162X    | 56X  | -     | 37X  | 35X  |
| HG02572     | HPRC      | 31X  | 17X  | 7X            | 162X    | 133X | 37X   | 37X  | 37X  |
| HG02622     | HPRC      | 46X  | 15X  | 7X            | 110X    | 61X  | 39X   | 34X  | 36X  |
| HG02630     | HPRC      | 49X  | 21X  | 9X            | 104X    | 64X  | 40X   | 35X  | 36X  |
| HG02717     | HPRC      | 45X  | 29X  | 10X           | 107X    | 85X  | 39X   | 37X  | 39X  |
| HG02886     | HPRC      | 44X  | 34X  | 14X           | 161X    | 67X  | 41X   | 47X  | 34X  |
| HG03453     | HPRC      | 52X  | 12X  | 5X            | 109X    | 70X  | 35X   | 43X  | 35X  |
| HG03516     | HPRC      | 36X  | 46X  | 17X           | 170X    | 57X  | 33X   | 35X  | 36X  |
| HG03540     | HPRC      | 49X  | 31X  | 13X           | 168X    | 62X  | 40X   | 36X  | 36X  |
| HG03579     | HPRC      | 48X  | 17X  | 7X            | 165X    | 83X  | 35X   | 36X  | 35X  |
| HG002       | HPRC_PLUS | 178X | 710X | 66X           | 102X    | 382X | 33X   | 33X  | 33X  |
| HG005       | HPRC_PLUS | 47X  | 58X  | 5X            | -       | -    | 51X   | 115X | 113X |
| HG00733     | HPRC_PLUS | 33X  | 78X  | 5X            | 90X     | 64X  | 36X   | 35X  | 35X  |
| HG01109     | HPRC_PLUS | 32X  | 71X  | 9X            | 158X    | 24X  | 37X   | 36X  | 39X  |
| HG01243     | HPRC_PLUS | 35X  | 60X  | 6X            | 155X    | 30X  | 35X   | 36X  | 36X  |
| HG02055     | HPRC_PLUS | 40X  | 65X  | 7X            | 156X    | 32X  | 37X   | 33X  | 34X  |
| HG02080     | HPRC_PLUS | 34X  | 56X  | 6X            | 144X    | 32X  | 37X   | 34X  | 33X  |
| HG02109     | HPRC_PLUS | 31X  | -    | -             | 222X    | 40X  | -     | 36X  | 45X  |
| HG02145     | HPRC_PLUS | 36X  | -    | -             | 142X    | 37X  | 36X   | 33X  | 47X  |
| HG02723     | HPRC_PLUS | 46X  | -    | -             | 155X    | 25X  | 39X   | 36X  | 36X  |
| HG02818     | HPRC_PLUS | 37X  | -    | -             | -       | -    | 38X   | 35X  | 38X  |
| HG03098     | HPRC_PLUS | 36X  | 57X  | 2X            | 114X    | 26X  | 36X   | 37X  | 34X  |
| HG03486     | HPRC_PLUS | 39X  | -    | -             | -       | -    | 37X   | 34X  | 33X  |
| HG03492     | HPRC_PLUS | 34X  | 51X  | 3X            | 155X    | 34X  | 34X   | 37X  | 36X  |
| NA18906     | HPRC_PLUS | 42X  | -    | -             | -       | -    | 35X   | 36X  | 36X  |
| NA19240     | HPRC_PLUS | 40X  | -    | -             | -       | -    | 35X   | 45X  | 35X  |
| NA20129     | HPRC_PLUS | 38X  | -    | -             | -       | -    | 36X   | 34X  | 36X  |
| NA21309     | HPRC_PLUS | 39X  | -    | -             | -       | -    | 45X   | 32X  | 33X  |
| HPRC Median |           | 40X  | 31X  | 11X           | 163X    | 72X  | 37X   | 36X  | 36X  |
| All Median  |           | 39X  | 35X  | 10X           | 162X    | 64X  | 37X   | 36X  | 36X  |

\*Of the listed samples, 29 had data produced by the consortium including: (i) Pacific Biosciences HiFi long-read data, (ii) Oxford Nanopore Technologies long-read data (11X >= 100KB), (iii) Hi-C contact maps, and (iv) Bionano physical maps. All DNA was collected from early passages of

LCLs. Seven of the samples also have Strand-Seq data for phasing and detecting inversions. Each assembled sequence in the data release is from the offspring of a trio. Trio sequencing data (Illumina NovaSeq from TruSeq PCR-free libraries) from the New York Genome Center's High Coverage 1KG dataset<sup>1</sup> were used for assembly and QC and included in the release. The remaining 18 assembled samples in the release are aggregated from data produced outside of the HPRC consortium including GIAB and the Human Genome Structural Variation Consortium (HGSC), listed above as HPRC\_PLUS.

- 1 Byrska-Bishop, M. *et al.* High coverage whole genome sequencing of the expanded 1000 Genomes Project cohort including 602 trios. *bioRxiv*, 2021.2002.2006.430068, doi:10.1101/2021.02.06.430068 (2021).

## Supplementary Information

### The Human Pangenome Project: A Global Resource to Map Genomic Diversity

#### Current Membership of the Human Pangenome Reference Consortium

##### The Human Pangenome Reference Consortium Coordination Center

Lucinda Antonacci-Fulton<sup>1</sup>, Eddie Belter<sup>1</sup>, Sarah Cody<sup>1</sup>, Changxu Fan<sup>1,2,3</sup>, Paul Flicek<sup>4</sup>, Ira M. Hall<sup>5</sup>, David Haussler<sup>6,7</sup>, Heather A. Lawson<sup>1,2,3</sup>, Daofeng Li<sup>1,2,3</sup>, Joshua F. McMichael<sup>1</sup>, Karen H. Miga<sup>6</sup>, Benedict Paten<sup>6</sup>, Chad Tomlinson<sup>1</sup>, Deepak Purushotham<sup>1,2,3</sup>, Ting Wang<sup>1,2,3</sup>, Ann Zhang<sup>1,2,3</sup>

##### Sample Working Group including Teams for Population Genetics and Ethical, Legal, and Social Issues

Carlos Bustamante<sup>8</sup>, Judy Cho<sup>9,10,11</sup>, Robert Cook-Deegan<sup>12</sup>, Jean-Francois Deleuze<sup>13</sup>, Richard Durbin<sup>14,15</sup>, Simon Easteal<sup>16</sup>, Evan E. Eichler<sup>17,18</sup>, Xiaowen Feng<sup>19,20</sup>, Nanibaa Garrison<sup>21,22,23</sup>, Nadine Gassner<sup>6</sup>, Mary Goldman<sup>6</sup>, Ed Green<sup>6</sup>, David Haussler<sup>6,7</sup>, Erich D. Jarvis<sup>24,25</sup>, Eimear E. Kenny<sup>9,11</sup>, Barbara A. Koenig<sup>26</sup>, Bastien Llamas<sup>27,28</sup>, Nicole C. Lockhart<sup>29</sup>, Bartha M. Knoppers<sup>30</sup>, Ann M. McCartney<sup>31</sup>, Karen H. Miga<sup>6</sup>, Jessica Mozersky<sup>32</sup>, Hardip Patel<sup>27,28</sup>, Alice B. Popejoy<sup>33</sup>, Charles Rotimi<sup>34</sup>, Charmaine Royal<sup>35</sup>, Yassine Souilmi<sup>27,28</sup>, Nathan O Stitzel<sup>1,2,36</sup>, Lisa Wang<sup>9,11</sup>

##### Technology and Production Working Group

Mark Akeson<sup>6</sup>, Brandy Baird<sup>6</sup>, Giulio Formenti<sup>24,25</sup>, Robert S. Fulton<sup>1</sup>, Ed Green<sup>6</sup>, Miten Jain<sup>6</sup>, Brittany Kerr<sup>37</sup>, Chris Markovic<sup>1</sup>, Matthew W. Mitchell<sup>37</sup>, Katy Munson<sup>17</sup>, Hugh Olsen<sup>6</sup>, Sadye Paez<sup>24,25</sup>, William Rowell<sup>38</sup>, Sam Sacco<sup>39</sup>, Lauren Shalmiyev<sup>24,25</sup>, Arvis Sulovari<sup>17</sup>

##### Assembly, T2T, and Pangenome Working Group

Mobin Asri<sup>6</sup>, Pete Audano<sup>17</sup>, Paolo Carnevali<sup>40</sup>, Mark Chaisson<sup>41</sup>, Shubham Chandak<sup>42</sup>, Xian Chang<sup>6</sup>, Haoyu Cheng<sup>19,20</sup>, Vincenza Colonna<sup>43</sup>, Daniel Doerr<sup>44</sup>, Peter Ebert<sup>44</sup>, Jana Ebler<sup>44</sup>, Evan E. Eichler<sup>17,18</sup>, Jordan Eizenga<sup>6</sup>, Olivier Fedrigo<sup>24,25</sup>, Xiaowen Feng<sup>19,20</sup>, Christian Fischer<sup>45</sup>, Stacey Gabriel<sup>46</sup>, Yan Gao<sup>47</sup>, Shilpa Garg<sup>19,20,48</sup>, Kiran Garimelle<sup>46</sup>, Erik Garrison<sup>45</sup>, Ed Green<sup>6</sup>, Stephanie Greer<sup>49</sup>, Andrea Guarracino<sup>50</sup>, Ira M. Hall<sup>5</sup>, William Harvey<sup>17</sup>, Marina Haukness<sup>6</sup>, David Haussler<sup>6,7</sup>, Simon Heumos<sup>51</sup>, Glenn Hickey<sup>6</sup>, Kerstin Howe<sup>15</sup>, Eric D. Jarvis<sup>24,25</sup>, Hanlee Ji<sup>49</sup>, Sergey Koren<sup>31</sup>, Hojoon Lee<sup>42</sup>, Heng Li<sup>19,20</sup>, Wen-Wei Liao<sup>5</sup>, Ryan Lorig-Roach<sup>6</sup>, Ernesto Lowy<sup>4</sup>, Tony Tsung Yu Lu<sup>41</sup>, Shuangjia Lu<sup>5</sup>, Julian Lucas<sup>6</sup>, Rebecca Serra Mari<sup>44</sup>, Dmitri Pavlichin<sup>49</sup>, Pierre Marijon<sup>44</sup>, Charles Markello<sup>6</sup>, Tobias Marschall<sup>44</sup>, Melissa Merediths<sup>6</sup>, Karen H. Miga<sup>6</sup>, Jean Monlong<sup>6</sup>, Njagi Mwaniki<sup>45,52</sup>, Eugene W. Myers<sup>53,54,55</sup>, Adam M. Novack<sup>6</sup>, Sergey Nurk<sup>31</sup>, Benedict Paten<sup>6</sup>, Dmitri Pavlichin<sup>42</sup>, Trevor Pesout<sup>6</sup>, Adam M. Phillippy<sup>31</sup>, Brandon Pickett<sup>31</sup>, David Porubksy<sup>17</sup>, Pjotr Prins<sup>45</sup>, Mikko Rautiainen<sup>31</sup>, Arang Rhie<sup>31</sup>, Kishwar Shafin<sup>6</sup>, Jonas Sibbesen<sup>6</sup>, Jouni Siren<sup>6</sup>, Varsha Sreekanth<sup>6</sup>, Arvis Sulovari<sup>17</sup>, Kedar Tatwawadi<sup>42</sup>, Flavia Villani<sup>41</sup>, Mitchell Vollger<sup>17</sup>, Alexander Wait Zaranek<sup>48</sup>, Tsachy Weissman<sup>42</sup>

##### Annotation, Maintenance and Improvement Working Group

Derek Albracht<sup>1</sup>, Eddie Belter<sup>1</sup>, Shelby Bidwell<sup>56</sup>, Konstantinos Billis<sup>4</sup>, Caryn Carson<sup>1,2,3</sup>, Karen Clark<sup>56</sup>, Mark Diekhans<sup>6</sup>, Sarah Dyer<sup>4</sup>, Susan Fairley<sup>4,57</sup>, Paul Flicek<sup>4</sup>, Adam Frankish<sup>4</sup>, Nadine Gassner<sup>6</sup>, Carlos Garcia Giron<sup>4</sup>, Mary Goldman<sup>6</sup>, Tina A. Graves-Lindsay<sup>1</sup>, Marina Haukness<sup>6</sup>, Kevin Howe<sup>15</sup>, Sarah Hunt<sup>4</sup>, Paul Kitts<sup>56</sup>, Milinn Kremitzki<sup>1</sup>, Fergal Martin<sup>23</sup>, Terence Murphy<sup>30</sup>, Valerie Schneider, Francoise Thibaud-Nissen<sup>30</sup>, Sergey Nurk<sup>13</sup>, David Thybert<sup>4</sup>, Thomas Walsh<sup>4</sup>, Ting Wang<sup>1,2,3</sup>, Chunlin Xiao<sup>56</sup>, Daniel Zerbino<sup>4</sup>, Xiaoyu Zhuo<sup>1,2,3</sup>

##### National Human Genome Research Institute

Adam L. Felsenfeld<sup>58</sup>, Carolyn M. Hutter<sup>58</sup>, Nicole C. Lockhart<sup>58</sup>, Baergen I. Schultz<sup>58</sup>, Michael W. Smith<sup>58</sup>, Heidi J. Sofia<sup>58</sup>

#### Associate Members

Omar Eduardo Cornejo Ordaz<sup>59</sup>, Simon Easteal<sup>16</sup>, Obed Amar Garcia<sup>33</sup>, George Liu<sup>60</sup>, Hardip Patel<sup>27,28</sup>, Jeffrey Rosenfeld<sup>61</sup>, Steven Salzberg<sup>62</sup>, Alaina Shumate<sup>62</sup>

#### **Affiliations:**

1. McDonnell Genome Institute, Washington University School of Medicine, St. Louis, MO, USA
2. Department of Genetics, Washington University School of Medicine, St. Louis, MO, USA
3. Edison Family Center for Genome Sciences and Systems Biology, Washington University School of Medicine, St. Louis, MO, USA
4. European Molecular Biology Laboratory, European Bioinformatics Institute, Wellcome Genome Campus, Hinxton, Cambridge, UK
5. Yale School of Medicine, New Haven, CT, USA
6. UC Santa Cruz Genomics Institute, University of California, Santa Cruz, CA, USA
7. Howard Hughes Medical Institute, University of California, Santa Cruz, CA, USA
8. Department of Biomedical Data Science, Genetics and Biology, Stanford University School of Medicine, Stanford, CA, USA
9. Charles Bronfman Institute for Personalized Medicine, Icahn School of Medicine at Mount Sinai, New York, NY, USA
10. Department of Medicine, Icahn School of Medicine at Mount Sinai, New York, NY, USA
11. Department of Genetics and Genomic Sciences, Icahn School of Medicine at Mount Sinai, New York, NY, USA
12. Arizona State University, Barrett & O'Connor Washington Center, Washington DC, USA
13. Centre National de Recherche en Génomique Humaine, Institut François Jacob, Direction de la Recherche Fondamentale, CEA, Evry, France
14. Department of Genetics, University of Cambridge, Cambridge, UK
15. Wellcome Sanger Institute, Cambridge, UK
16. Australian Centre for Ancient DNA, School of Biological Sciences, University of Adelaide, National Centre for Indigenous Genomics, Australian National University, Canberra, Australia
17. Department of Genome Sciences, University of Washington School of Medicine, Seattle, WA, USA
18. Howard Hughes Medical Institute, University of Washington, Seattle, WA, USA
19. Department of Data Science, Dana-Farber Cancer Institute, Boston, MA, USA
20. Department of Biomedical Informatics, Harvard Medical School, Boston, MA, USA
21. Institute for Society & Genetics, University of California, Los Angeles, CA, USA
22. Institute for Precision Health, David Geffen School of Medicine, University of California, Los Angeles, CA, USA
23. Division of General Internal Medicine & Health Services Research, David Geffen School of Medicine, University of California, Los Angeles, CA, USA
24. Vertebrate Genome Lab, The Rockefeller University, New York, NY, USA
25. Laboratory of Neurogenetics of Language, The Rockefeller University, New York, NY, USA
26. Division of Genetics, University of California, San Francisco, San Francisco, CA, USA
27. Australian Centre for Ancient DNA, School of Biological Sciences, University of Adelaide, Adelaide, Australia

28. National Centre for Indigenous Genomics, Australian National University, Canberra, Australia
29. National Institutes of Health (NIH)-National Human Genome Research Institute, Bethesda, MD, USA
30. Centre of Genomics and Policy, McGill University, Montreal, Québec, Canada
31. Genome Informatics Section, National Human Genome Research Institute, Bethesda, MD, USA
32. Division of General Medical Sciences, Washington University School of Medicine, St. Louis, MO, USA
33. Department of Biomedical Data Science, Stanford University School of Medicine, Stanford, CA, USA
34. Center for Research on Genomics and Global Health, National Human Genome Research Institute, Bethesda, MD, USA
35. Department of African & African American Studies, Duke University, Durham, NC, USA
36. Department of Medicine, Washington University School of Medicine, St Louis, MO, USA
37. Coriell Institute for Medical Research, Camden, NJ, USA
38. Pacific Biosciences, Menlo Park, CA, USA
39. Department of Quantitative and Computational Biology, University of Southern California, Los Angeles, CA, USA
40. Chan Zuckerberg Initiative, Redwood City, CA, USA
41. Department of Quantitative and Computational Biology, University of Southern California, Los Angeles, CA, USA
42. Department of Electrical Engineering, Stanford University, Stanford, CA, USA
43. Institute of Genetics and Biophysics, Consiglio Nazionale di Ricerche, Naples, Italy
44. Heinrich Heine University, Medical Faculty, Institute for Medical Biometry and Bioinformatics, Düsseldorf, Germany
45. Department of Genetics, Genomics and Informatics, University of Tennessee Health Science Center, Memphis, TN, USA
46. The Broad Institute of Harvard and MIT, Cambridge, MA, USA
47. Department of Critical Care Medicine, The First Affiliated Hospital of Harbin Medical University, Heilongjiang Province, China
48. Department of Genetics, Harvard Medical School, Boston, MA, USA
49. Department of Medicine, Stanford University, School of Medicine, Stanford, CA, USA
50. IIGM - Italian Institute for Genomic Medicine, c/o IRCSS, Candiolo, Italy, Department of Biology, University of Rome "Tor Vergata", Rome, Italy
51. Quantitative Biology Center (QBiC), University of Tübingen, Tübingen 72076, Germany
52. Kemri Wellcome Trust, Kenya
53. Max Planck Institute of Molecular Cell Biology and Genetics, Dresden, Germany
54. Center for Systems Biology, Dresden, Germany
55. Faculty of Computer Science, Technical University Dresden, Dresden, Germany
56. National Center for Biotechnology Information (NCBI), National Library of Medicine, Bethesda, MD, USA
57. Global Alliance for Genomics and Health, Toronto, Canada
58. National Institutes of Health (NIH)-National Human Genome Research Institute, Bethesda, MD, USA
59. School of Biological Sciences, Washington State University, Pullman, WA, USA
60. US Department of Agriculture (USDA) Agricultural Research Service (ARS), Beltsville, MD, USA
61. Rutgers Cancer Institute and the Department of Pathology and Laboratory Medicine at the Robert Wood Johnson School of Medicine, USA
62. Johns Hopkins University, Baltimore, MD, USA
